# Supplementary material
Source: PubMed Central journal article supplement (PMC5472991)
Supplement: NIHMS860119-supplement-Supplemental.pdf [file NIHMS860119-supplement-Supplemental.pdf]

## **Supplementary Material**

**Antibodies.** The following were used: mouse anti-human TBM monoclonal (clone IA4) (gift of Dr Phil Bird, Monash University, Australia); peroxidase-labelled sheep anti-FITC (POD) (Roche, Dee Why, Australia), rabbit anti-human von Willebrand factor (vWF) (DakoCytomation, Hamburg, Germany); TCR  $\alpha/\beta$  clone R73 (AbD Serotec, Kidlington, UK).

**Histopathology.** Fresh-frozen tissue sections (4 $\mu$ m) were stained with mouse anti-hTBM-FITC (1:100) followed by sheep anti-FITC POD (1:250). vWF staining was performed on paraffin-embedded sections, which were incubated with the primary antibody followed by DAKO Envision<sup>+</sup> goat anti-rabbit HRP. Slides were developed and counterstained with Ehrlich's haematoxylin (Sigma-Aldrich, Sydney, Australia).

**Statistical analysis.** Quantitative data were summarized by mean and standard error of the mean (SEM). Statistical analyses were performed with Microsoft Excel and Graphpad Prism 5 (Graphpad Software, Inc., CA, USA) using the unpaired t-test and the Wilcoxon signed rank test. The two-tailed p value was calculated;  $p < 0.05$  was regarded as significant.

**Ethical approvals:** All experiments were approved by and conducted under the supervision of the Animal Ethics Committee of St. Vincent's Hospital Melbourne.

### **Full blood counts and clotting studies**

Platelet counts and coagulation parameters were measured using EDTA and citrate treated blood respectively on a full blood count (FBC) analyser (Sysmex, SE-9000, TOA Medical Electronics Co Ltd, Kobe, Japan).

**Measurement of renal function.**

Whole blood was collected via an Inferior vena cava puncture and analysed using an Olympus AU 2700 (Integrated Science, Chatswood, NSW, Australia). Creatinine and urea are expressed in mmol/l. Platelet and whole blood aggregation.

**Whole blood and washed platelet aggregation.**

**Preparation of whole blood.** 500  $\mu$ l of citrated venous blood (1:10 v/v) was drawn from the inferior vena cava (IVC) of anaesthetised mice. The blood was diluted 1:2 with normal saline to which 2 mM  $\text{CaCl}_2$  and 4 units /ml collagen was added.

Impedance aggregation was determined using an aggregometer, (Chrono-log, model number 570VS, Chrono-log, Haverton PA). Platelet aggregation is detected by passing a very small electric current between two electrodes immersed in whole blood, and measuring the impedance between the electrodes. During the initial contact with the sample a monolayer of platelets forms on the electrodes, when the agonist is added there is gradual aggregation at the electrodes increasing the impedance.

**Preparation of washed platelets.** Blood was collected via the IVC into acid-citrate dextrose (90 mM sodium citrate, 7 mM citric acid, pH 4.6, 140 mM dextrose, 70 mM theophylline) as anticoagulant (9:1 ratio). 200 microlitres of platelet wash buffer (43 mM  $\text{Na}_2\text{HPO}_4$ , 24.3 mM  $\text{NaH}_2\text{PO}_4 \cdot 2\text{H}_2\text{O}$ , 4.3 mM  $\text{K}_2\text{HPO}_4$ , 113 mM NaCl, 5.5 mM glucose) was added and the mixture was centrifuged at 200 g for 2 minutes at 37C without brakes. The supernatant (platelet-rich plasma, PRP) was removed and stored at 37C. The process was repeated. The PRP was then centrifuged at 2000 g for 2 minutes with brakes and the platelet pellet resuspended in 550 $\mu$ l of Tyrodes buffer (137 mM NaCl, 2 mM KCl, 12 mM  $\text{NaHCO}_3$ , 0.3 mM  $\text{NaH}_2\text{PO}_4$ , 1mM

MgCl<sub>2</sub>·6H<sub>2</sub>O, 5.5 mM glucose, 5 mM HEPES, pH 7.3). The platelets were allowed to recover for 30 minutes at 37°C.

Washed platelets as obtained above were then counted, and standardised so that  $2 \times 10^5$  washed platelets/ $\mu$ l of Tyrodes buffer were reconstituted with fibrinogen, and aggregation was by optical (turbidometric) aggregation on an aggregometer (Chrono-log, model number 570VS Chrono-log, Haverton PA). Dual beam infra-red light sources and photodiode detectors are used to determine the difference in light transmission between platelet rich plasma (PRP) and platelet poor plasma (PPP).

### P selectin staining.

Washed platelets (obtained as described above) were stained with P selectin (CD62P) (BD Pharmingen, San Diego, California) on ice for 30 minutes and analysed using a FACScalibur flow cytometer (Becton Dickinson, NJ).

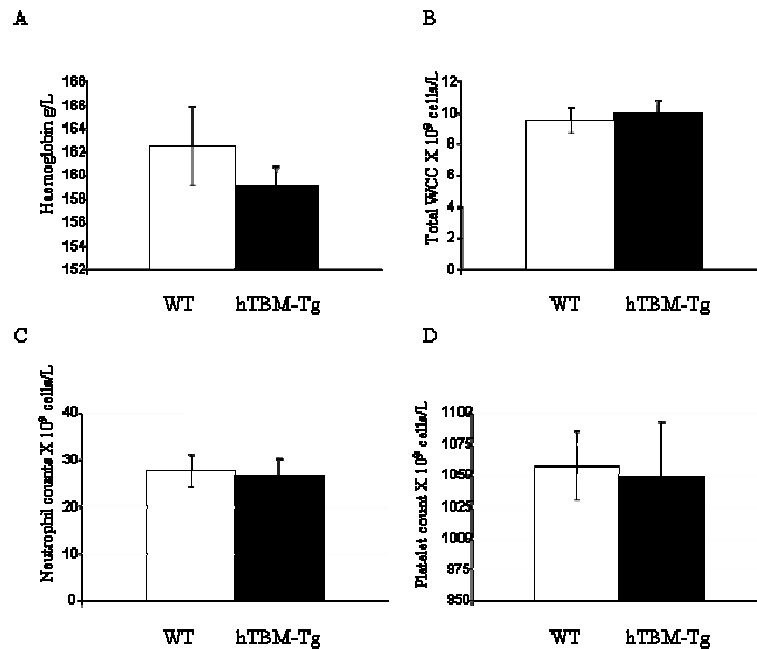

Supplementary figure 1) Haematological testing. A) Haemoglobin, B) WCC, C) Neutrophil count, D) Platelet count

Results presented as mean  $\pm$  SEM, N=6 per group.

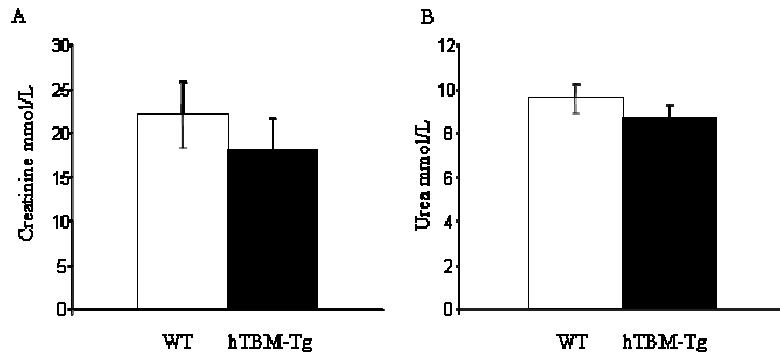

Supplementary figure 2) Renal function as assessed by A) creatinine B) urea. Results presented as mean  $\pm$  SEM, N=6 per group.

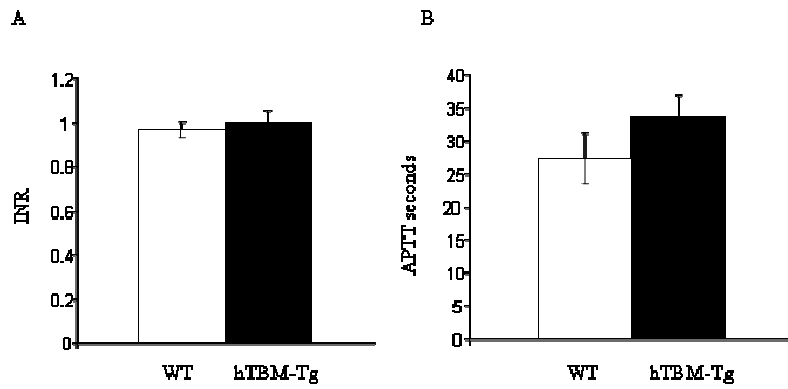

Supplementary figure 3) A) INR and B) APTT. Results presented as mean  $\pm$  SEM, N=6 per group.

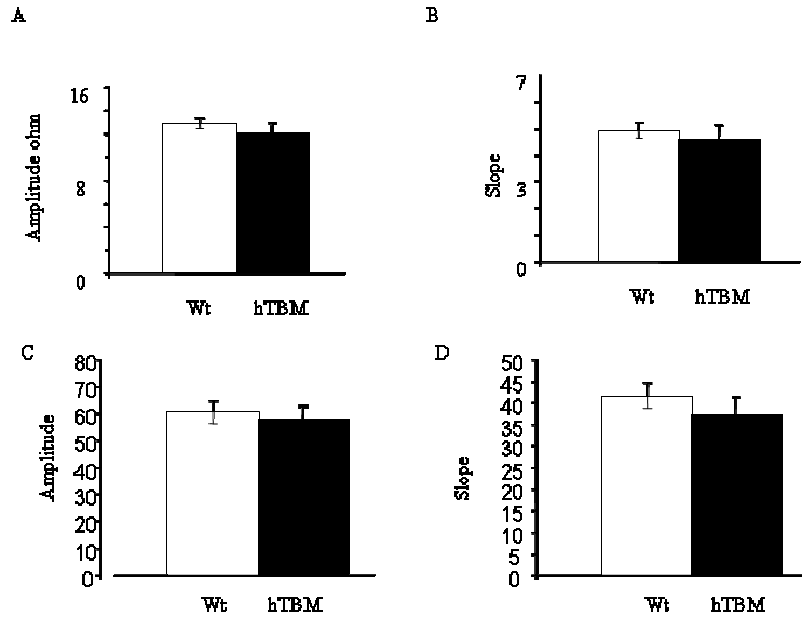

Supplementary figure 4) Whole blood (A&B) and washed platelet (C&D) aggregometry response to collagen (4units/ml). The mean of experiments demonstrated no difference in amplitude or slope to time to clot in whole blood (A & B respectively) or washed platelets (C & D respectively). Results presented as mean  $\pm$  SEM, N=6 per group.

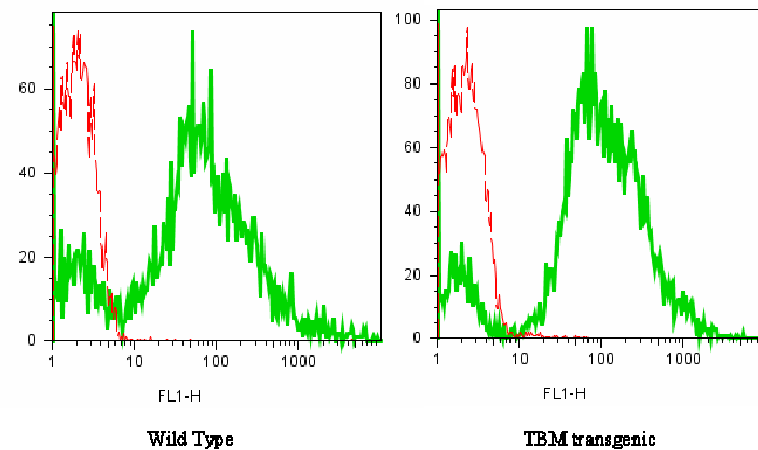

Supplementary figure 5) Washed platelets were obtained. P selectin expression post high dose thrombin stimulation (1U/ml) (green) and in resting platelets (red) from wild type and TBM transgenic mice fail to demonstrate any difference in expression.
